# Supplementary material for: Soluble programmed cell death-1 predicts hepatocellular carcinoma development during nucleoside analogue treatment
Source: PubMed Central journal article supplement (PMC8741806; doi:10.1038/s41598-021-03706-w), 2022-01-07
Supplement: 41598_2021_3706_MOESM1_ESM.pdf [file 41598_2021_3706_MOESM1_ESM.pdf]

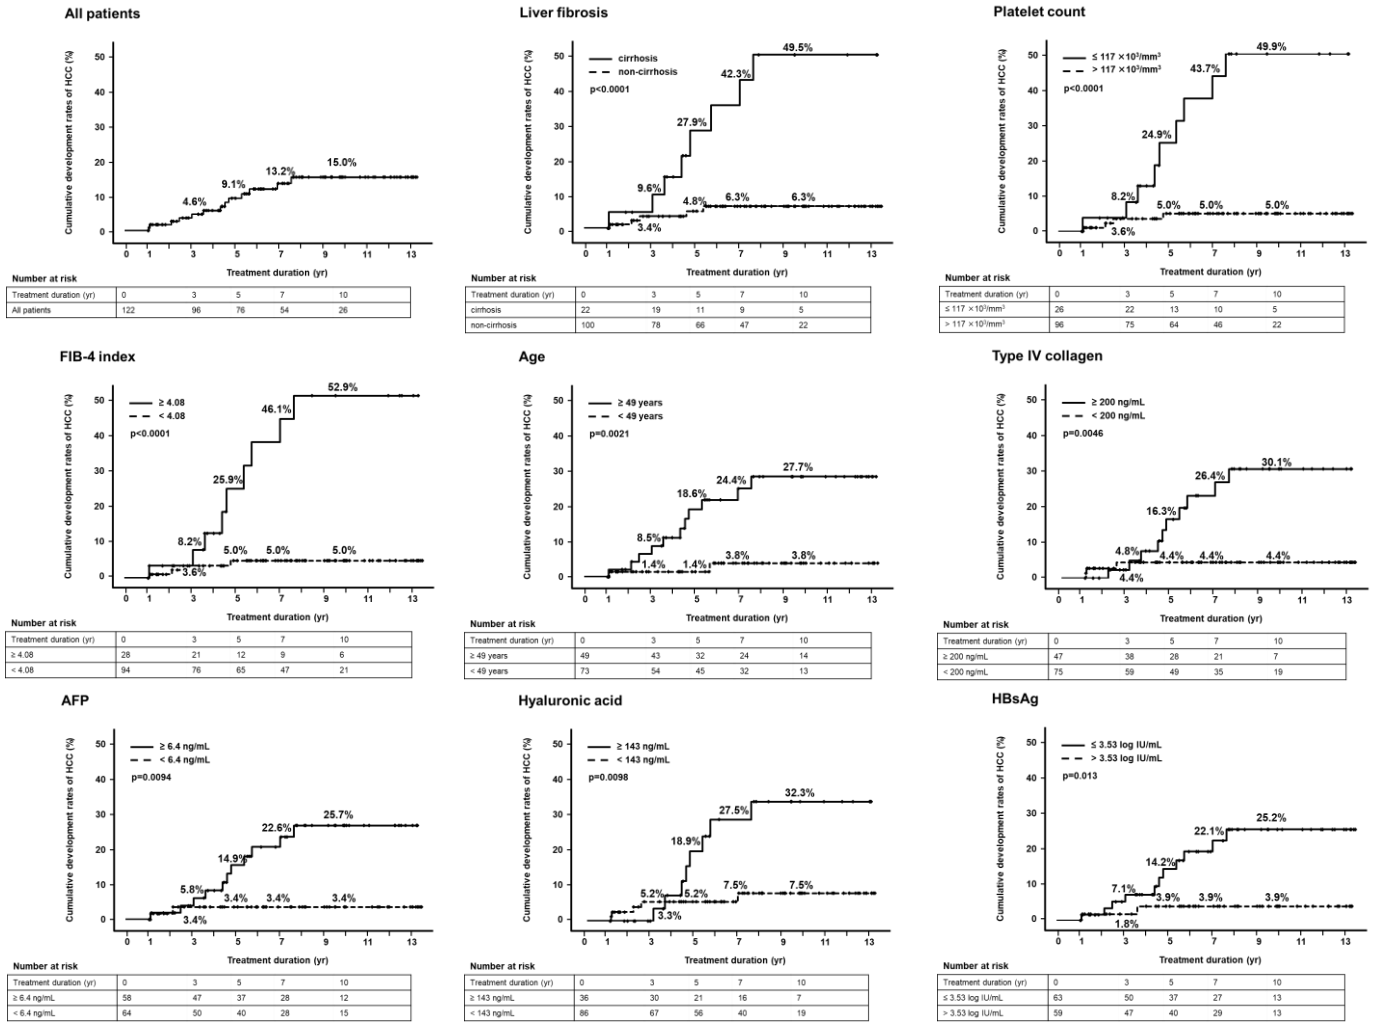

**Supplementary Figure 1.** Cumulative rates of hepatocellular carcinoma (HCC) development in all patients according to the liver fibrosis status, platelet count, fibrosis-4 (FIB-4) index, age, and levels of type IV collagen,  $\alpha$ -fetoprotein (AFP), hyaluronic acid, and hepatitis B surface antigen (HBsAg) at baseline.
